# Supplementary material
Source: Springer Nature journal article supplement (https://www.springermedizin.de/resource/supplementary/12889_2012_4674_MOESM1_ESM.pdf/9490634)
Supplement: MOESM1 [file 9490634]

## Questionnaire (Self)

1. How old are you?

2. Are you circumcised?

3. If you are circumcised, how old were you when you were circumcised?

4. Have you been in contact with information regarding circumcision; or Have you look for information regarding circumcision?

5. If you have been in contact with information regarding circumcision, has it primarily been:

① pro-circumcision

② anti-circumcision

③ both sides

6. Where did you find information on circumcision? (multiple choices allowed)

① internet ② newspaper ③ book ④ lecture ⑤ television ⑥ other

## Questionnaire (Parent)

1. How old are you?

2. How old is your son?

3. Is he circumcised?

4. If he circumcised, how old was he when he was circumcised?

5. Have you been in contact with information regarding circumcision; or Have you look for information regarding circumcision?

6. If you have been in contact with information regarding circumcision, has it primarily been:

① pro-circumcision

② anti-circumcision

③ both sides

7. Where did you find information on circumcision? (multiple choices allowed)

① internet ② newspaper ③ book ④ lecture ⑤ television ⑥ other
